# Supplementary material for: Occurrence of Antithrombotic Related Adverse Events in Hospitalized Patients: Incidence and Clinical Context between 2008 and 2016
Source: MDPI journal article supplement (doi:10.3390/jcm8060839), 2019-06-12
Supplement: s1 [file s1]

## Supplementary material

**Table S1:** Model parameters

| Parameter                                                         | Model:<br>MRAE deceased<br>OR (95% CI) | Model:<br>MRAE discharged<br>OR (95% CI) | Model:<br>ARAE deceased<br>OR (95% CI) | Model:<br>ARAE discharged<br>OR (95% CI) |
|-------------------------------------------------------------------|----------------------------------------|------------------------------------------|----------------------------------------|------------------------------------------|
| Year 2011/2012 (ref: 2008)                                        | 0.88 (0.63-1.22)                       | 1.24 (0.73-2.09)                         | 0.58 (0.30-1.13)                       | 1.00 (0.38-2.64)                         |
| Year 2015/2016 (ref: 2008)                                        | 0.76 (0.54-1.08)                       | n/a                                      | 0.45 (0.23-0.88)                       | n/a                                      |
| Academic Hospital<br>(ref: tertiary teaching hospital)            | 0.99 (0.66-1.48)                       | 1.54 (0.74-3.19)                         | 1.37 (0.56-3.32)                       | 0.24 (0.03-1.85)                         |
| General Hospital<br>(ref: tertiary teaching hospital)             | 1.25 (0.91-1.72)                       | 1.24 (0.69-2.23)                         | 2.21 (1.12-4.37)                       | 0.33 (0.11-0.96)                         |
| Gender (ref: female)                                              | 0.94 (0.73-1.21)                       | 0.89 (0.55-1.43)                         | 1.02 (0.61-1.71)                       | 0.75 (0.28-1.99)                         |
| Age                                                               | 0.99 (0.98-1.00)                       | 1.01 (1.00-1.03)                         | 1.01 (0.99-1.03)                       | 1.07 (1.02-1.11)                         |
| Non elective admission<br>(ref: elective admission)               | 0.74 (0.51-1.06)                       | 1.06 (0.60-1.88)                         | 0.64 (0.32-1.28)                       | 0.84 (0.27-2.65)                         |
| Underwent surgery<br>(ref: no surgery)                            | 1.02 (0.70-1.49)                       | 0.28 (0.11-0.70)                         | 1.48 (0.74-2.98)                       | 0.17 (0.03-0.99)                         |
| Admitted to surgical unit<br>(ref: admitted to non-surgical unit) | 0.75 (0.48-1.17)                       | 0.45 (0.20-1.03)                         | 0.97 (0.45-2.11)                       | 1.32 (0.40-4.37)                         |

n/a: parameter was not included in model

**Table S2:** Antithrombotic related adverse event example cases for each specific clinical situation

| Case                                                          | Summary                                                                                                                                                                                                                             | Discharge status | Preventability score <sup>a</sup> |
|---------------------------------------------------------------|-------------------------------------------------------------------------------------------------------------------------------------------------------------------------------------------------------------------------------------|------------------|-----------------------------------|
| <b>Elevated INR</b>                                           |                                                                                                                                                                                                                                     |                  |                                   |
| 1                                                             | Intracranial haemorrhaging and decease following a fall incident together with elevated INR (>10).                                                                                                                                  | Deceased         | 2-3                               |
| 2                                                             | Intracranial bleed following a delayed response ( $\pm$ 36 H) to elevated INR (9.3)                                                                                                                                                 | Deceased         | 2-3                               |
| 3                                                             | Rectal bleeding following elevated INR. Prothrombin complex concentrate was prescribed but not signed off on medication chart and no INR verification performed.                                                                    | Deceased         | 4-6                               |
| 4                                                             | Haemoptysis with elevated INR (6.9) after starting Ceftriaxone.                                                                                                                                                                     | Deceased         | 4-6                               |
| 5                                                             | Gastrointestinal bleeding following elevated INR (16) and concomitant use of NSAID without PPI.                                                                                                                                     | Deceased         | 4-6                               |
| 6                                                             | Hematemesis following elevated INR (>8) which was only reversed with Prothrombin complex concentrate, therefor haematuria 2 days later after which Vitamin-K was administered.                                                      | Deceased         | 4-6                               |
| 7                                                             | Bladder bleeding after radiotherapy for bladder cancer and elevated INR.                                                                                                                                                            | Deceased         | 4-6                               |
| 8                                                             | Gastrointestinal bleeding following elevated INR (7.6) and no concomitant PPI for prednisone use.                                                                                                                                   | Alive            | 4-6                               |
| 9                                                             | Epistaxis following elevated INR due to concomitant use of Amoxicillin/clavulanic acid.                                                                                                                                             | Alive            | 2-3                               |
| 10                                                            | Variceal bleeding following elevated INR (>10) and decompensated liver cirrhosis.                                                                                                                                                   | Deceased         | 2-3                               |
| 11                                                            | Subdural haematoma and decease following elevated INR (7.52) and delayed (72H) reversal.                                                                                                                                            | Deceased         | 2-3                               |
| 12                                                            | Pretibial haematoma following elevated INR (6.0) and Norfloxacin for urosepsis.                                                                                                                                                     | Alive            | 2-3                               |
| 13                                                            | Epistaxis and gastrointestinal bleeding following elevated INR (5.4) and ASA and Clopidogrel use for ACS.                                                                                                                           | Deceased         | 4-6                               |
| 14                                                            | TIA following reversal of elevated INR (6.4) with a too strong dose of Vitamin-K resulting in INR <1.                                                                                                                               | Deceased         | 4-6                               |
| 15                                                            | Internal bleeding and shock following elevated INR (7.5) for which prescribed Vitamin-K was not administered.                                                                                                                       | Deceased         | 4-6                               |
| 16                                                            | Gastrointestinal/variceal bleeding and decease following repeated elevated INR (7.5) and liver cirrhosis.                                                                                                                           | Deceased         | 4-6                               |
| <b>VTE prophylaxis</b>                                        |                                                                                                                                                                                                                                     |                  |                                   |
| 17                                                            | Pulmonary embolism following inadequate VTE prophylaxis.                                                                                                                                                                            | Deceased         | 4-6                               |
| 18                                                            | Pulmonary embolism following pneumonia and no VTE prophylaxis.                                                                                                                                                                      | Deceased         | 4-6                               |
| 19                                                            | Pulmonary embolism following metastasized pancreas carcinoma and no VTE prophylaxis.                                                                                                                                                | Deceased         | 2-3                               |
| 20                                                            | Deceased most likely due to pulmonary embolism following hip revision surgery with too low VTE prophylaxis dose.                                                                                                                    | Deceased         | 4-6                               |
| <b>Perioperative/periprocedural antithrombotic management</b> |                                                                                                                                                                                                                                     |                  |                                   |
| 21                                                            | Severe postoperative bleeding and decease after hip replacement surgery while INR was elevated (10.4). Preoperative INR was not tested.                                                                                             | Deceased         | 4-6                               |
| 22                                                            | Bladder bleeding following a correct ASA restart after interruption for nephroureterectomy.                                                                                                                                         | Alive            | 1                                 |
| 23                                                            | Deceased due to a.basilaris thrombus following the interruption of ASA and Dipyridamole for hip surgery against Neurologists advise.                                                                                                | Deceased         | 2-3                               |
| 24                                                            | Post procedural bleeding following polypectomy and correctly interrupted acenocoumarol.                                                                                                                                             | Alive            | 1                                 |
| 25                                                            | Haemoptysis and haemorrhagic shock following oesophagoscopy with tumour biopsy for which Phenprocoumon was reversed with Prothrombin complex concentrate but INR was not verified pre-procedurally. (INR: 2.8 day after procedure). | Deceased         | 4-6                               |

|                                           |                                                                                                                                                 |          |     |
|-------------------------------------------|-------------------------------------------------------------------------------------------------------------------------------------------------|----------|-----|
| 26                                        | Ischaemic CVA following the preoperative interruption of Acenocoumarol without the use of LMWH bridging.                                        | Deceased | 2-3 |
| 27                                        | Post procedural bleeding following liver biopsy and insufficiently reversed oral anticoagulants.                                                | Deceased | 4-6 |
| <b>Disputed antithrombotic indication</b> |                                                                                                                                                 |          |     |
| 28                                        | Rectal blood loss from diverticulum while using ASA for questionable TIA indication                                                             | Alive    | 2-3 |
| 29                                        | Gastric bleeding while using Clopidogrel for questionable ACS indication. No concomitant PPI prescribed.                                        | Deceased | 4-6 |
| 30                                        | Recurrent kidney bleeding after kidney trauma and Dalteparin use.                                                                               | Alive    | 4-6 |
| 31                                        | Intestinal bleeding and decease following Nadroparin and possibly contraindicated Clopidogrel use.                                              | Deceased | 2-3 |
| <b>Adverse drug reaction</b>              |                                                                                                                                                 |          |     |
| 32                                        | Nausea and weight loss during Dipyridamole use after TIA. Symptoms disappeared after interruption of Dipyridamole                               | Alive    | 1   |
| 33                                        | Heparin induced thrombocytopenia following UFH use. 48 hour delay before UFH was interrupted.                                                   | Deceased | 4-6 |
| <b>Patient related</b>                    |                                                                                                                                                 |          |     |
| 34                                        | Haematuria and sepsis following the manipulation of urine catheter by patient using ASA and Clopidogrel                                         | Deceased | 1   |
| 35                                        | Found dead, possibly cardiac following the interruption of Clopidogrel and ASA, on patient initiative, 3 months after coronary stent placement. | Deceased | 1   |
| <b>Other</b>                              |                                                                                                                                                 |          |     |
| 36                                        | Haematoma and mucus bleeding while using ASA and clopidogrel after stent placement.                                                             | Alive    | 1   |
| 37                                        | Gastro intestinal bleed during Dexamethasone for malignancy and Nadroparin use for pulmonary emboli.                                            | Deceased | 1   |
| 38                                        | Persistent epistaxis while using ASA and Clopidogrel after stent placement                                                                      | Alive    | 1   |
| 39                                        | Retroperitoneal bleeding and decease following Acenocoumarol use for atrial fibrillation and CVA 1 week before.                                 | Deceased | 1   |
| 40                                        | Subdural haematoma following a fall incident while using Acenocoumarol.                                                                         | Deceased | 4-6 |
| 41                                        | Intracranial bleeding and decease while INR is in therapeutic range.                                                                            | Deceased | 1   |
| 42                                        | Retroperitoneal bleeding and transfusion following continuous venovenous hemofiltration with UFH.                                               | Deceased | 1   |
| 43                                        | Bleeding and severe swelling of hand around intravenous infusion needle following the use of various antithrombotic drugs.                      | Alive    | 1   |
| 44                                        | Haemoptysis with bronchiecstasis following ASA initiation for TIA.                                                                              | Alive    | 1   |
| 45                                        | Bleeding from percutaneous coronary intervention entry site during antiplatelet use.                                                            | Deceased | 1   |

INR International Normalized Ratio; NSAID Non-Steroidal Anti-inflammatory Drug; PPI Proton Pump Inhibitor; ASA Acetylsalicylic Acid; ACS Acute Coronary Syndrome; TIA Transient Ischaemic Attack; VTE Venous Thromboembolism; CVA Cerebrovascular Accident; LMWH Low Molecular Weight Heparin; UFH Unfractionated Heparin

<sup>a</sup>Preventability scores of 4 and higher were classified as potential preventable
